# Supplementary material for: Solution conformation of d(C4ACAC4TGT)2; an intramolecularly folded i-motif from the insulin minisatellite
Source: Royal Society of Chemistry journal article supplement (doi:10.1039/b504606h), 2005-01-01
Supplement: b504606h.pdf [file b504606h.pdf]

V. Jolad *et al.*

Solution conformation of d(C<sub>4</sub>ACAC<sub>4</sub>TCT)<sub>2</sub>; an intramolecularly folded i-motif from the insulin minisatellite.

**UV Thermal melting data.**

**Table 1. Melting temperatures for the single strand DNA at different pHs over wide range of concentration. Temperature was changed in 0.5 °C steps with a 5 min hold time at each temperature.**

| [DNA] / μM | <i>T<sub>m</sub></i> / °C |        |        |
|------------|---------------------------|--------|--------|
|            | pH 7.2                    | pH 6.1 | pH 5.0 |
| 1.2        | *                         | 36.8   | 50.9   |
| 2.5        | 25.3                      | 38.2   | 52.4   |
| 4.6        | 29.2                      | 39.3   | 51.4   |
| 8.5        | 33.5                      | 41.1   | 52.7   |
| 11.0       | 35.2                      | 41.7   | 53.5   |
| 15.6       | 36.7                      | 41.4   | 52.7   |
| 19.7       | 38.2                      | 43.0   | 53.8   |
| 22.3       | 41.4                      | 44.0   | 53.3   |
| 29.0       | 43.1                      | 44.8   | 53.6   |

\* Melting temperature too low for the equipment to reliably measure

**Table 2 Thermodynamic parameters for i-motif formation extracted from oligomer concentration studies at different pH values.**

| Thermodynamic parameters                         | pH 7.2      | pH 6.1     | pH 5.0      |
|--------------------------------------------------|-------------|------------|-------------|
| $\Delta H^\circ / \text{kJmol}^{-1}$             | -110.8±6.2  | -339.3±9.3 | -903.7±12.6 |
| $\Delta S^\circ / \text{Jmol}^{-1}\text{K}^{-1}$ | -379.6±10.9 | -1098±14.3 | -2792±17.5  |
| $\Delta G^\circ_0 / \text{kJmol}^{-1}$           | -7.4±1.1    | -39.5±3.6  | -141.5±5.2  |
| $\Delta G^\circ_{25} / \text{kJmol}^{-1}$        | +2.1±0.02   | -12.1±1.4  | -71.7±3.8   |
| $\Delta G^\circ_{37} / \text{kJmol}^{-1}$        | +6.7±0.04   | +1.1       | -38.2±0.8   |
| <i>T<sub>m</sub></i> at [NMR] / °C               | 29.5        | 42.8       | 54.2        |

**Table3: Chemical shifts of the protons of a DNA i-motif at pH 6 and 5 °C, the shifts are referenced to TSP at 0 ppm.**

| Residue    | Chemical shifts of protons in ppm |              |              |               |               |      |      |       |       |               |              |              |
|------------|-----------------------------------|--------------|--------------|---------------|---------------|------|------|-------|-------|---------------|--------------|--------------|
|            | H1'                               | H2'          | H2''         | H3'           | H4'           | H5'  | H5'' | H5/Me | H6/H8 | Imino         | Amino        |              |
|            |                                   |              |              |               |               |      |      |       |       |               | <i>cis</i>   | <i>trans</i> |
| <b>C1</b>  | 6.47                              | 1.97         | 2.62         | 4.87          | 3.83          | na   | na   | 5.95  | 7.73  | <b>15.57</b>  | 9.55         | 8.33         |
| <b>C2</b>  | 5.97                              | <sup>b</sup> | 2.62         | <sup>na</sup> | 4.24          | na   | na   | 5.72  | 7.84  |               | 9.86         | 8.51         |
| <b>C3</b>  | 6.18                              | <sup>b</sup> | 2.31         | 4.56          | <sup>na</sup> | na   | na   | 5.72  | 7.48  | <b>15.58</b>  | 9.56         | 7.74         |
| <b>C4</b>  | 6.17                              | <sup>b</sup> | 2.68         | 4.65          | 4.16          | na   | na   | 5.70  | 7.94  | -             | 9.75         | 8.50         |
| <b>A5</b>  | 6.18                              | 2.12         | <sup>c</sup> | 4.83          | 4.21          | na   | na   | -     | 8.41  | -             | 9.71         |              |
| <b>C6</b>  | 6.53                              | 1.99         | 2.64         | 4.86          | 4.42          | na   | na   | 6.07  | 8.07  | <sup>na</sup> | 8.50         |              |
| <b>A7</b>  | 6.69                              | 2.25         | 2.71         | 4.42          | <sup>na</sup> | na   | na   | -     | 8.34  | -             | 9.47         |              |
| <b>C8</b>  | 6.06                              | 2.24         | 2.81         | <sup>na</sup> | na            | na   | na   | 5.79  | 7.56  |               | 8.98         | <sup>b</sup> |
| <b>C9</b>  | 6.70                              | <sup>b</sup> | 2.71         | 4.86          | 4.42          | na   | na   | 5.99  | 7.98  | <b>15.45</b>  | 9.18         | 8.24         |
| <b>C10</b> | 6.03                              | <sup>b</sup> | 2.47         | 4.80          | <sup>na</sup> | na   | na   | 5.43  | 7.40  | <sup>b</sup>  | <sup>b</sup> | <sup>b</sup> |
| <b>C11</b> | 5.96                              | <sup>b</sup> | <sup>c</sup> | 4.07          | na            | na   | na   | 5.67  | 7.76  | <b>15.68</b>  | 8.36         | <sup>b</sup> |
| <b>T12</b> | 5.94                              | 2.19         | 2.74         | 4.46          | 3.83          | na   | na   | 1.88  | 7.23  | 11.10         | -            | -            |
| <b>G13</b> | 6.27                              | 2.74         | 2.98         | 4.19          | <sup>na</sup> | na   | na   | -     | 8.12  | 11.28         | -            | -            |
| <b>T14</b> | 5.92                              | 2.02         | 2.99         | 4.25          | 3.91          | 4.10 | 3.85 | 1.40  | 7.30  | 11.10         | -            | -            |
| <b>C15</b> | 6.02                              | 1.67         | 2.77         | <sup>na</sup> | <sup>na</sup> | na   | na   | 5.62  | 7.56  |               | 9.16         | <sup>b</sup> |
| <b>C16</b> | 6.23                              | 1.85         | 2.63         | <sup>na</sup> | 3.78          | na   | na   | 5.99  | 7.98  | <b>15.71</b>  | 10.0         | 8.22         |
| <b>C17</b> | 6.53                              | 2.40         | 2.49         | 4.51          | 4.24          | na   | na   | 6.03  | 7.87  |               | 9.44         | <sup>b</sup> |
| <b>C18</b> | 6.44                              | <sup>b</sup> | <sup>c</sup> | 4.58          | 4.09          | na   | na   | 5.91  | 7.66  | <b>15.66</b>  | 9.13         | 8.23         |
| <b>A19</b> | 6.88                              | <sup>b</sup> | <sup>c</sup> | <sup>b</sup>  | 4.51          | na   | na   | -     | 8.41  | -             | 9.71         |              |
| <b>C20</b> | 6.45                              | <sup>b</sup> | <sup>c</sup> | 4.16          | <sup>b</sup>  | na   | na   | 5.37  | 7.43  | 10.98         | 8.43         |              |
| <b>A21</b> | 6.83                              | 1.85         | <sup>c</sup> | 4.69          | <sup>b</sup>  | na   | na   | -     | 8.26  | -             | 9.27         |              |
| <b>C22</b> | 6.38                              | 2.14         | 2.58         | 4.71          | 4.30          | na   | na   | 5.88  | 7.65  | <b>15.66</b>  | 9.13         | 8.20         |
| <b>C23</b> | 6.29                              | 2.06         | 2.51         | 4.47          | 4.10          | na   | na   | 6.08  | 8.06  |               | 8.52         | <sup>b</sup> |
| <b>C24</b> | 6.81                              | 1.85         | <sup>c</sup> | <sup>b</sup>  | <sup>b</sup>  | na   | na   | 6.02  | 7.57  | <sup>b</sup>  | <sup>b</sup> | <sup>b</sup> |
| <b>C25</b> | 6.43                              | 2.14         | 2.60         | <sup>b</sup>  | 4.07          | na   | na   | 5.67  | 7.76  |               | 9.85         | 8.52         |
| <b>T26</b> | 6.42                              | 2.14         | 2.61         | 4.50          | 4.24          | na   | na   | 1.98  | 7.85  | 11.28         | -            | -            |
| <b>G27</b> | 5.97                              | 2.61         | 3.03         | 4.52          | 3.92          | na   | na   | -     | 8.17  | 11.28         | -            | -            |
| <b>T28</b> | <sup>c</sup>                      | <sup>c</sup> | <sup>c</sup> | 4.41          | 4.08          | na   | na   | 1.74  | 7.14  | 11.39         | -            | -            |

na: not assigned.

b: Not identified due to overlapping cross-peaks or lack of connectivity.

c: Barely resolved and not distinguished.

**Table 4: The changes in aromatic proton chemical shifts caused by reducing the pH from 7 to 6 at 5 °C (ppm)**

| Residue | Chemical Shift Change                           |        |
|---------|-------------------------------------------------|--------|
|         | $\delta_{\text{pH } 6} - \delta_{\text{pH } 7}$ |        |
|         | H6/ H8                                          | H5/ Me |
| C1      | 0.01                                            | 0.03   |
| C2      | -0.06                                           | 0.05   |
| C3      | 0.03                                            | 0.06   |
| C4      | 0.00                                            | 0.35   |
| A5      | -0.05                                           | -      |
| C6      | -0.10                                           | 0.08   |
| A7      | 0.12                                            | -      |
| C8      | 0.02                                            | -0.09  |
| C9      | 0.00                                            | 0.00   |
| C10     | 0.00                                            | 0.07   |
| C11     | -0.01                                           | -0.01  |
| T12     | 0.00                                            | 0.00   |
| G13     | 0.02                                            | -      |
| T14     | 0.01                                            | 0.01   |
| C15     | 0.00                                            | 0.03   |
| C16     | 0.00                                            | 0.00   |
| C17     | 0.02                                            | 0.08   |
| C18     | -0.03                                           | 0.01   |
| A19     | -0.05                                           | -      |
| C20     | -0.01                                           | 0.16   |
| A21     | 0.19                                            | -      |
| C22     | 0.00                                            | 0.00   |
| C23     | -0.07                                           | 0.00   |
| C24     | 0.00                                            | 0.01   |
| C25     | -0.01                                           | -0.01  |
| T26     | 0.02                                            | 0.00   |
| G27     | -0.09                                           | -      |
| T28     | 0.00                                            | 0.01   |

$\delta$ : Chemical shift

**Table 5: Intercalated nOe connections across the grooves revealing the folding topology of the i-motif at pH 6 and 5 °C.**

| <b>Intercalation patterns between inter-strand residues revealing the i-motif topology</b> |                                |                |                |                            |                            |
|--------------------------------------------------------------------------------------------|--------------------------------|----------------|----------------|----------------------------|----------------------------|
| <b>H1'-H1'</b>                                                                             | <b>NH<sub>2</sub>-H2'/ 2''</b> | <b>H1'-H4'</b> | <b>H3'-H4'</b> | <b>C<sup>+</sup>.C N3H</b> | <b>C<sup>+</sup>.C-H2'</b> |
| C1-C23                                                                                     | C16-C15H2'                     | C2-C9          | C9-C18         | C1-C15                     | C1:C15-C25                 |
| C4-C22                                                                                     | C17-C23H2'                     | C8-A19         | C3-C25         | C2-C16                     |                            |
| C8-C17                                                                                     | C8-C6H2'                       | T12-C25        |                | C3-C17                     |                            |
| G13-G27                                                                                    | C25-C17H2''                    | C23-C4         |                | C4-C18                     |                            |
| T12-T26                                                                                    | C18-C23H2'                     | T26-T12        |                | C8-C22                     |                            |
| C10-C17                                                                                    | C18-C23H2''                    |                |                | C9-C23                     |                            |
|                                                                                            | C2-C1H2''                      |                |                | C11-C25                    |                            |

### Some sample spectra

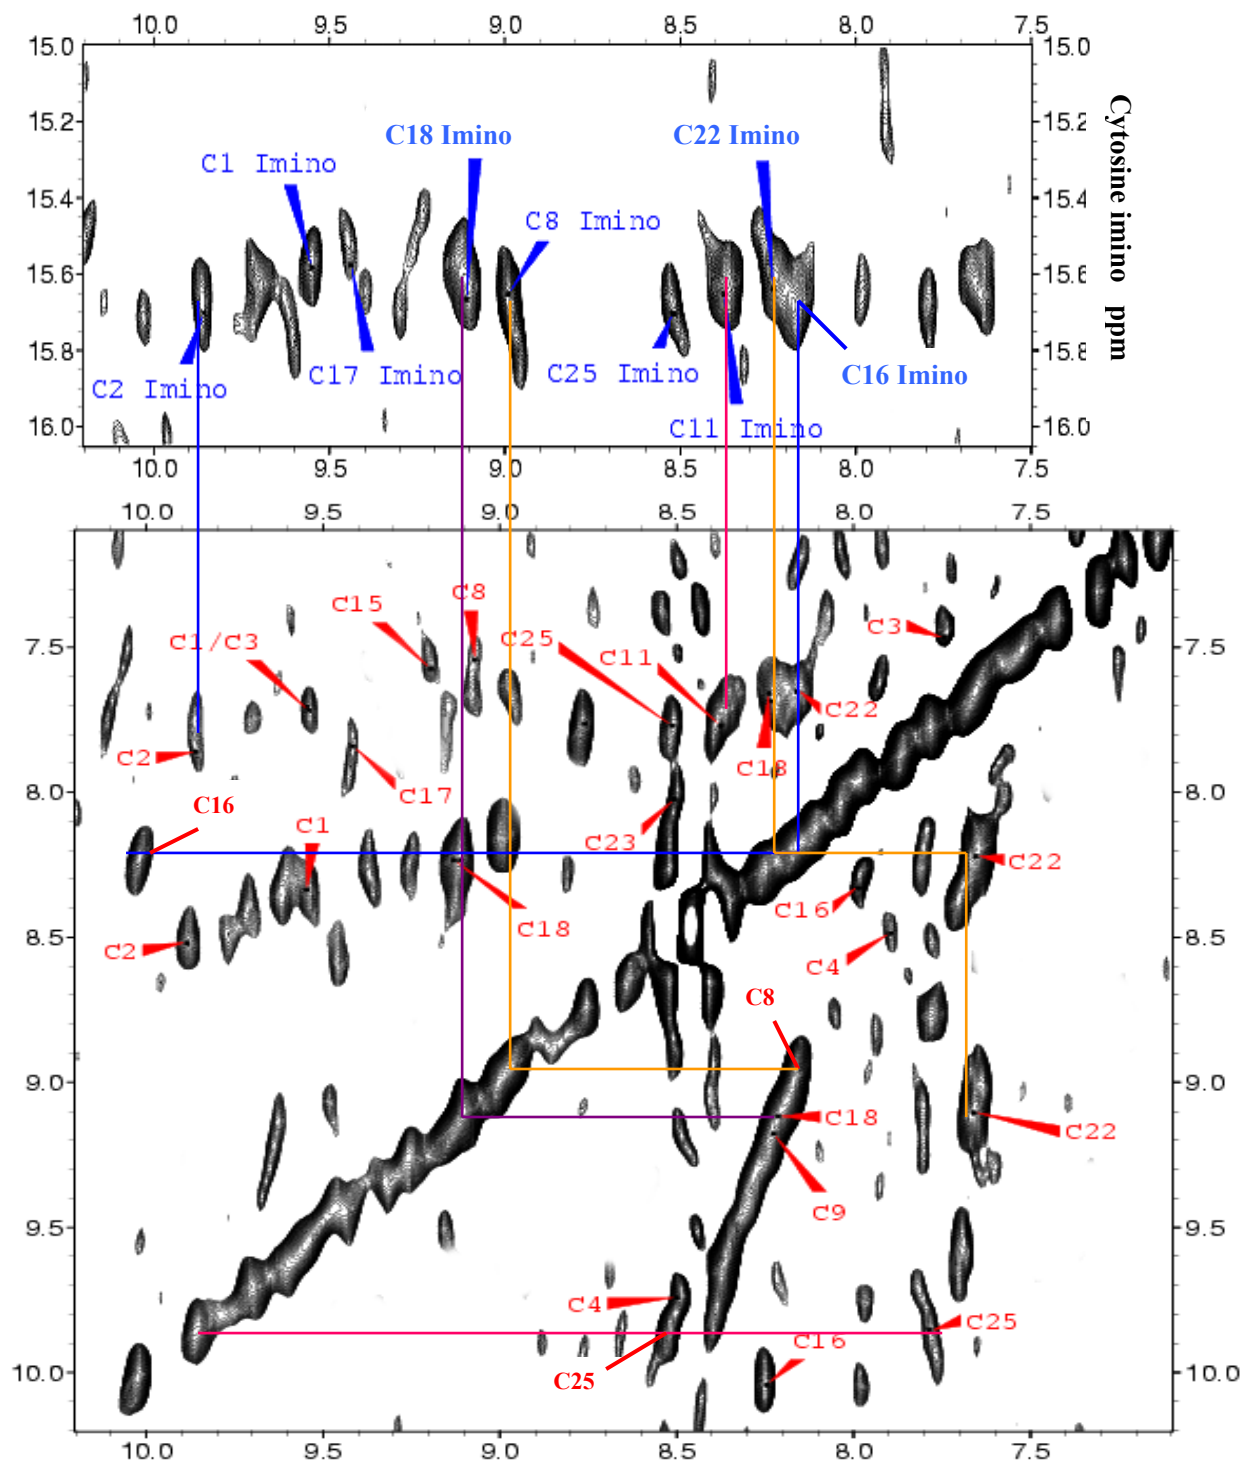

**Figure 1.** Section through the 500 MHz NOESY spectrum showing cytosine imino and amino correlations illustrating C<sup>+</sup>.C base-pair formation. Two lines of same colour indicate cytosines of same base-pair.

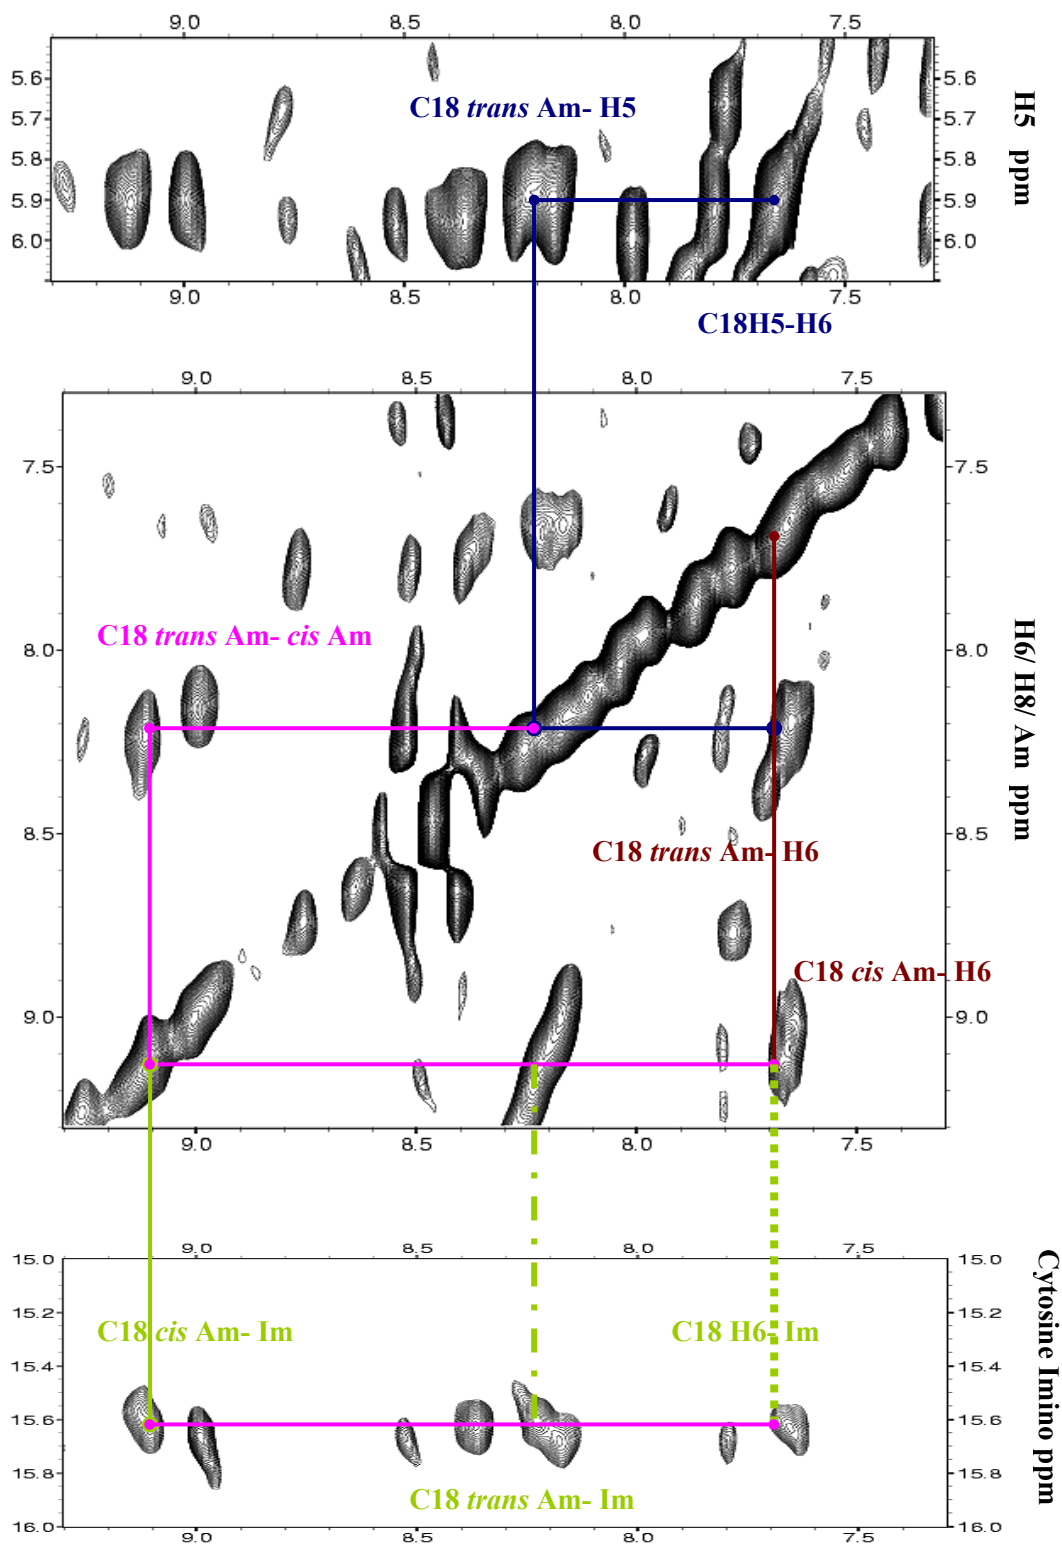

**Figure 2: Sections of 500 MHz NOESY spectrum illustrating the key nOe connections to reveal a cytosine imino proton of C18 residue.**
